# Supplementary material for: Performance modulation of transparent ALD indium oxide films on flexible substrates: transition between metal-like conductor and high performance semiconductor states
Source: Royal Society of Chemistry journal article supplement (doi:10.1039/c6tc01199c), 2016-01-01
Supplement: c6tc01199c1.pdf [file c6tc01199c1.pdf]

## Supporting Information

Performance Modulation of Transparent ALD Indium Oxide Films on Flexible Substrates:

Transition between Metal-like Conductor and High Performance Semiconductor States

Jiazhen Sheng<sup>a</sup>, Dong-won Choi<sup>a</sup>, Seung-Hwan Lee<sup>a</sup>, Jozeph Park<sup>b\*</sup>, Jin-Seong Park<sup>a\*</sup>

<sup>a</sup> Division of Materials Science and Engineering Hanyang University, Seongdong-gu, Seoul, Republic of Korea.

<sup>b</sup> Department of Materials Science and Engineering, KAIST, 291 Daehak-ro, Yuseong-gu, Daejeon, 34141, Republic of Korea.

\*E-mail: [jsparklime@hanyang.ac.kr](mailto:jsparklime@hanyang.ac.kr) and [jozeph.park@gmail.com](mailto:jozeph.park@gmail.com)

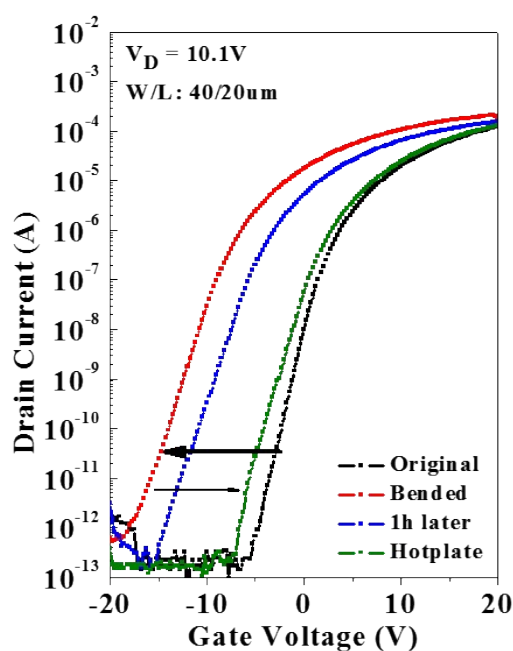

**Figure S1.** Representative transfer characteristics in the Original state, After Bending, 1 hour after stress removal, and after thermal treatment on a Hotplate (at 200°C for 20 min.), respectively.

|              | $V_{th}$ [V] | $M_{sat}$ [ $cm^2/Vs$ ] | S.S. [V/decade] | $I_{ON}/I_{OFF}$ |
|--------------|--------------|-------------------------|-----------------|------------------|
| Original     | <b>0.3</b>   | <b>9.2</b>              | <b>0.96</b>     | <b>4.6E+9</b>    |
| Bended       | <b>-10.4</b> | <b>7.2</b>              | <b>1.5</b>      | <b>2.1E+9</b>    |
| 1 hour later | <b>-7.0</b>  | <b>7.8</b>              | <b>1.2</b>      | <b>1.4E+9</b>    |
| Hotplate     | <b>-0.7</b>  | <b>8.9</b>              | <b>0.8</b>      | <b>1.8E+9</b>    |

**Table S1.** Device parameters in the Original state, After Bending, 1 hour after stress removal, and after thermal treatment on a Hotplate (at 200°C for 20 min.), respectively.
